# Supplementary material
Source: publisher site journal article supplement (https://www.dovepress.com/article/517669)
Supplement: Supplementary file 1 [file 517669%20Revised%20Appendix%201.docx]

**Appendix 1: *Interview Questions***

1. In your own words, please define what a green team is.
2. In your own words, please define what a sustainability office is.
3. In your own words, please explain to me the similarities and differences between the two.
4. **For leaders only:** How many people are on your team/employed in your office?
5. What made you decide to join your green team/sustainability office?
6. Can you share a brief history (or as much as you know) of your green team/sustainability office?
   1. *Prompts:* *How long has it been around? How did it get established? Who was involved?*
7. How does your team/office prioritize what to work on?
8. What are some of the most exciting things you are doing right now?
9. Has your team suggested any course of action to reduce waste, energy, and/or emissions that have not been approved by hospital management/leadership?
   1. *Prompt: Describe the situation and explain why you think it turned out this way.*
10. **For health care providers only**: Does working with a green team/sustainability office influence the way you provide patient care? *Prompts:* *Are you able to bring in values of sustainability into your work? In what ways? How does this practically look like?*
11. Does your green team/sustainability office have contact with hospital management/leadership? *Prompt: What does this look like? Who do you talk to?*
12. How do you get management/leadership support for your sustainability initiatives/projects?
13. Do you feel like there is widespread support at your hospital for the work you do with your green team/sustainability office?
    1. *If yes: How did this come to be?*
    2. *If no: Why not?*
14. What would you say are the main factors that support your work and lead to successful outcomes for green team/sustainability office intiatives and projects?
15. What would you say are the main barriers in leading succesful initiatives or initating/completing projects?
16. I will read to you several sustainability accreditation standards (see next page) created by HSO and assessed by Accreditation Canada. These standards are under the Governance and Leadership categories. Do you think your green team/sustainability office can help your hospital achieve these? Please provide details on how.
17. Do you have any comments on the sustainabiltiy accreditation standards? Are these enough? Should there be more or different standards?
